# Supplementary material for: “XA6” octahedra influencing the arrangement of anionic groups and optical properties in inverse-perovskite [B6O10]XA3(X = Cl, Br; A = alkali metal)
Source: Royal Society of Chemistry journal article supplement (doi:10.1039/c6cp01288d), 2016-01-01
Supplement: c6cp01288d1.pdf [file c6cp01288d1.pdf]

## Supporting Information

# “XA<sub>6</sub>” Octahedra Influencing the Arrangement of Anionic Groups and Optical Properties in Inverse-Perovskite [B<sub>6</sub>O<sub>10</sub>]XA<sub>3</sub> (X=Cl, Br; A=alkali metal)

Zhijia Yang,<sup>a</sup> Bing-Hua Lei,<sup>a,b</sup> Bin Yang,<sup>c</sup> Shilie Pan<sup>\*a</sup>

<sup>a</sup>Key Laboratory of Functional Materials and Devices for Special Environments, Xinjiang Technical Institute of Physics & Chemistry, Chinese Academy of Sciences; Xinjiang Key Laboratory of Electronic Information Materials and Devices, 40-1 South Beijing Road, Urumqi 830011, China.

<sup>b</sup>University of Chinese Academy of Sciences, Beijing 100049, China

<sup>c</sup>Department of Physics, Harbin Institute of Technology, Harbin 150001, China

*\*To whom correspondence should be addressed.*

*E-mail: splan@ms.xjb.ac.cn; zhyang@ms.xjb.ac.cn;*

### Electronic Supplementary Information:

**Figure S1.** The band structures of  $\alpha$ -RBOC calculated by GGA+PBE (a) and HSE06 (b).

**Figure S2** The partial density of states (PDOS) of  $\alpha$ -RBOC.

**Table S1.** The lattice constants of  $\alpha$ -RBOC.

**Table S2.** Independent elastic constants  $C_{ij}$ , bulk, shear, and Young's moduli (B, G and E all in GPa), Poisson's ratio  $\nu$  and B/G of  $\alpha$ -RBOC.

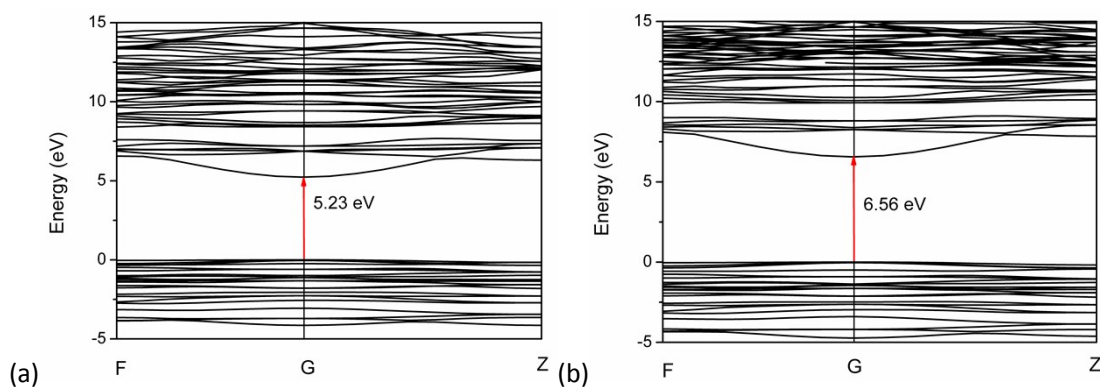

**Figure S1.** The band structures of  $\alpha$ -RBOC calculated by GGA+PBE (a) and HSE06 (b).

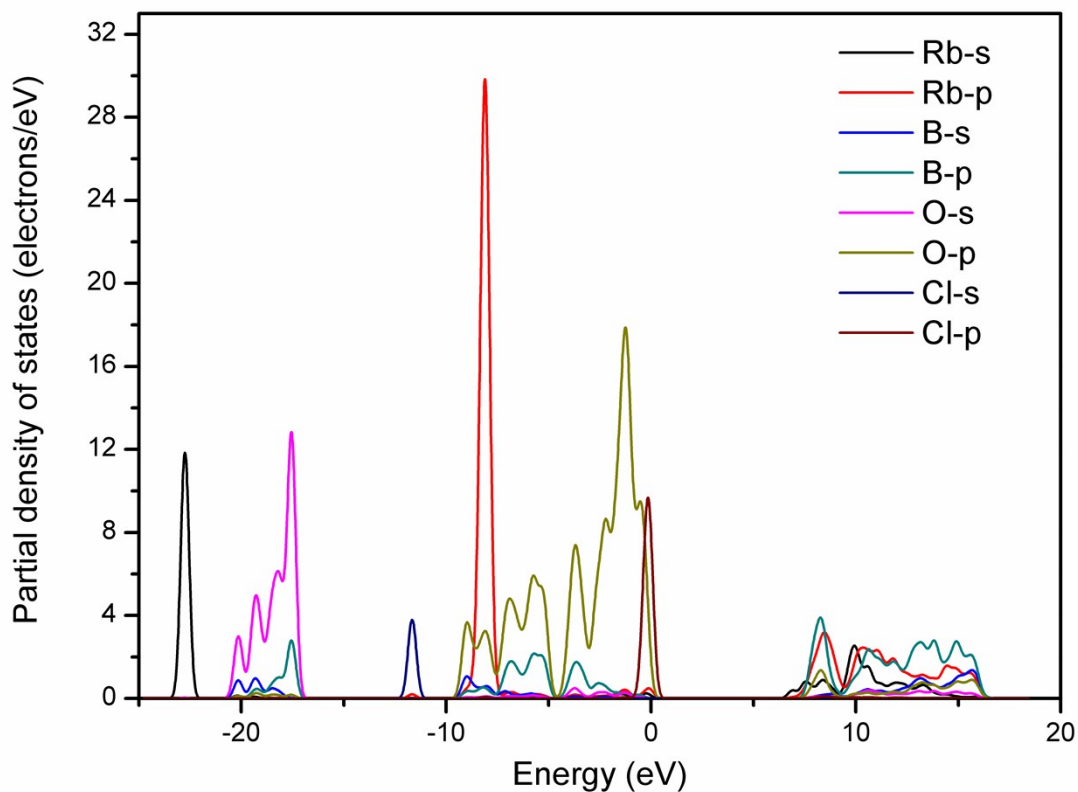

**Figure S2.** The partial density of states (PDOS) of  $\alpha$ -RBOC.

**Table S1.** The lattice constants of  $\alpha$ -RBOC

|                          |                |
|--------------------------|----------------|
| Compound                 | $\alpha$ -RBOC |
| Space group              | R3m            |
| Crystal system           | Trigonal       |
| a = b (Å)                | 10.271         |
| c (Å)                    | 9.221          |
| $\alpha=\beta$ (°)       | 90             |
| $\gamma$ (°)             | 120            |
| Volume (Å <sup>3</sup> ) | 842.494        |

**Table S2.** Independent elastic constants  $C_{ij}$ , bulk, shear, Young's moduli (B, G and E all in GPa), Poisson's ratio  $\nu$  and the ratio B/G of  $\alpha$ -RBOC.

| Crystal        | $C_{11}$ | $C_{33}$ | $C_{44}$ | $C_{12}$ | $C_{13}$ | $C_{14}$ | $C_{15}$ | B    | G    | E                  | $\nu$                                     | B/G  |
|----------------|----------|----------|----------|----------|----------|----------|----------|------|------|--------------------|-------------------------------------------|------|
| $\alpha$ -RBOC | 130.6    | 62.5     | 40.9     | 36.4     | 45.2     | 45.1     | 0        | 57.1 | 36.1 | x=y=93.0<br>Z=38.0 | xy=yx=0.085<br>xz=yz=0.661<br>zx=zy=0.270 | 1.59 |
